# Supplementary material for: Complex network of United States migration
Source: Springer Nature journal article supplement (doi:10.1186/s40649-019-0061-6), 2019-01-24
Supplement: MOESM1 [file 16419388]

| Time frame      | Nodes                       | Edges                       | Average degree | Avrg weighted degree        | Diameter    | Average path length          | Clustering Coefficient       | Modularity                   | Assortativity                |
|-----------------|-----------------------------|-----------------------------|----------------|-----------------------------|-------------|------------------------------|------------------------------|------------------------------|------------------------------|
| 2000            | 2,997                       | 59,315                      | 19.8           | 4,847                       | 9           | 3.39                         | 0.540                        | 0.671                        | 0.275                        |
| 2001            | 2,979                       | 58,687                      | 19.7           | 4,943                       | 9           | 3.39                         | 0.533                        | 0.681                        | 0.271                        |
| 2002            | 2,981                       | 57,357                      | 19.2           | 4,863                       | 9           | 3.42                         | 0.538                        | 0.688                        | 0.275                        |
| 2003            | 2,987                       | 59,689                      | 20.0           | 5,111                       | 9           | 3.43                         | 0.535                        | 0.686                        | 0.279                        |
| 2004            | 2,992                       | 59,615                      | 19.9           | 5,049                       | 9           | 3.42                         | 0.534                        | 0.675                        | 0.263                        |
| 2005            | 2,993                       | 62,358                      | 20.8           | 5,300                       | 9           | 3.40                         | 0.540                        | 0.668                        | 0.259                        |
| 2006            | 2,981                       | 60,884                      | 20.4           | 5,043                       | 9           | 3.40                         | 0.550                        | 0.670                        | 0.257                        |
| 2007            | 3,003                       | 61,828                      | 20.6           | 5,084                       | 9           | 3.39                         | 0.545                        | 0.677                        | 0.263                        |
| 2008            | 2,983                       | 59,663                      | 20.0           | 4,936                       | 8           | 3.41                         | 0.549                        | 0.689                        | 0.261                        |
| 2009            | 2,964                       | 56,348                      | 19.0           | 4,795                       | 9           | 3.45                         | 0.535                        | 0.695                        | 0.266                        |
| 2010            | 2,976                       | 58,468                      | 19.6           | 4,837                       | 9           | 3.42                         | 0.543                        | 0.684                        | 0.263                        |
| 2011            | 3,023                       | 65,155                      | 21.5           | 5,610                       | 10          | 3.37                         | 0.540                        | 0.676                        | 0.256                        |
| 2012            | 2,996                       | 67,086                      | 22.4           | 5,797                       | 9           | 3.34                         | 0.551                        | 0.668                        | 0.261                        |
| 2013            | 2,875                       | 46,455                      | 16.1           | 5,402                       | 12          | 3.64                         | 0.509                        | 0.675                        | 0.254                        |
| 2014            | 2,792                       | 36,001                      | 12.9           | 4,121                       | 11          | 3.80                         | 0.475                        | 0.709                        | 0.238                        |
| 2015            | 2,868                       | 46,889                      | 16.3           | 5,587                       | 10          | 3.62                         | 0.515                        | 0.681                        | 0.271                        |
| <b>Average</b>  | <b>2.9 x 10<sup>3</sup></b> | <b>5.7 x 10<sup>4</sup></b> | <b>19.3</b>    | <b>5 x 10<sup>3</sup></b>   | <b>9.4</b>  | <b>3.5</b>                   | <b>0.5</b>                   | <b>0.7</b>                   | <b>0.26</b>                  |
| <b>Variance</b> | <b>3.8 x 10<sup>3</sup></b> | <b>6.2 x 10<sup>7</sup></b> | <b>5.5</b>     | <b>1.6 x 10<sup>5</sup></b> | <b>0.9</b>  | <b>1.5 x 10<sup>-2</sup></b> | <b>3.7 x 10<sup>-4</sup></b> | <b>1.2 x 10<sup>-4</sup></b> | <b>9.9 x 10<sup>-5</sup></b> |
| 2000-2001       | 3,021                       | 68,453                      | 22.7           | 9,682                       | 9           | 3.29                         | 0.557                        | 0.693                        | 0.276                        |
| 2002-2003       | 3,014                       | 66,571                      | 22.1           | 9,875                       | 9           | 3.32                         | 0.560                        | 0.703                        | 0.274                        |
| 2004-2005       | 3,020                       | 70,889                      | 23.5           | 10,255                      | 8           | 3.31                         | 0.560                        | 0.682                        | 0.265                        |
| 2006-2007       | 3,023                       | 71,132                      | 23.5           | 10,024                      | 8           | 3.30                         | 0.566                        | 0.680                        | 0.264                        |
| 2008-2009       | 3,002                       | 67,476                      | 22.5           | 9,640                       | 8           | 3.32                         | 0.566                        | 0.699                        | 0.268                        |
| 2010-2011       | 3,034                       | 72,322                      | 23.8           | 10,322                      | 10          | 3.83                         | 0.562                        | 0.687                        | 0.259                        |
| 2012-2013       | 2,997                       | 68,595                      | 22.9           | 10,978                      | 9           | 3.32                         | 0.556                        | 0.683                        | 0.257                        |
| 2014-2015       | 2,880                       | 48,640                      | 16.9           | 9,560                       | 10          | 3.58                         | 0.520                        | 0.702                        | 0.259                        |
| <b>Average</b>  | <b>3 x 10<sup>3</sup></b>   | <b>6.6 x 10<sup>4</sup></b> | <b>22.2</b>    | <b>1 x 10<sup>4</sup></b>   | <b>8.8</b>  | <b>3.4</b>                   | <b>0.5</b>                   | <b>0.7</b>                   | <b>0.26</b>                  |
| <b>Variance</b> | <b>2.5 x 10<sup>3</sup></b> | <b>5.7 x 10<sup>7</sup></b> | <b>5</b>       | <b>2.2 x 10<sup>5</sup></b> | <b>0.70</b> | <b>3.7 x 10<sup>-2</sup></b> | <b>2.2 x 10<sup>-4</sup></b> | <b>8.7 x 10<sup>-5</sup></b> | <b>4.9 x 10<sup>-5</sup></b> |
| 2000-2003       | 3,044                       | 77,321                      | 25.4           | 19,387                      | 8           | 3.22                         | 0.573                        | 0.702                        | 0.274                        |
| 2004-2007       | 3,041                       | 81,653                      | 26.9           | 20,149                      | 8           | 3.21                         | 0.581                        | 0.685                        | 0.269                        |
| 2008-2011       | 3,044                       | 80,533                      | 26.4           | 19,783                      | 8           | 3.20                         | 0.582                        | 0.609                        | 0.263                        |
| 2012-2015       | 2,999                       | 70,443                      | 23.5           | 20,151                      | 8           | 3.30                         | 0.561                        | 0.695                        | 0.254                        |
| <b>Average</b>  | <b>3 x 10<sup>3</sup></b>   | <b>7.7 x 10<sup>4</sup></b> | <b>25.5</b>    | <b>2 x 10<sup>4</sup></b>   | <b>8</b>    | <b>3.2</b>                   | <b>0.6</b>                   | <b>0.7</b>                   | <b>0.26</b>                  |
| <b>Variance</b> | <b>5.3 x 10<sup>2</sup></b> | <b>2.5 x 10<sup>7</sup></b> | <b>2.2</b>     | <b>1.3 x 10<sup>5</sup></b> | <b>0</b>    | <b>1.8 x 10<sup>-3</sup></b> | <b>9.4 x 10<sup>-5</sup></b> | <b>1.8 x 10<sup>-3</sup></b> | <b>7.4 x 10<sup>-5</sup></b> |
| 2000-2015       | 3,081                       | 103,005                     | 33.4           | 78,109                      | 8           | 3.04                         | 0.598                        | 0.698                        | 0.26                         |
