# Supplementary material for: Complex network of United States migration
Source: Springer Nature journal article supplement (doi:10.1186/s40649-019-0061-6), 2019-01-24
Supplement: MOESM2 [file 16419388]

| Time frame      | Nodes     | Edges                       | Average degree | Avrg weighted degree        | Diameter   | Average path length          | Clustering Coefficient       | Modularity                   | Assortativity                |
|-----------------|-----------|-----------------------------|----------------|-----------------------------|------------|------------------------------|------------------------------|------------------------------|------------------------------|
| 2000            | 51        | 1808                        | 35.45          | 284807                      | 3          | 1.312                        | 0.826                        | 0.252                        | 0.865                        |
| 2001            | 51        | 1776                        | 34.82          | 288748                      | 2          | 1.323                        | 0.828                        | 0.289                        | 0.855                        |
| 2002            | 51        | 1784                        | 34.98          | 284279                      | 3          | 1.322                        | 0.825                        | 0.296                        | 0.863                        |
| 2003            | 51        | 1765                        | 34.608         | 299356                      | 3          | 1.328                        | 0.827                        | 0.297                        | 0.859                        |
| 2004            | 51        | 1773                        | 34.765         | 296228                      | 3          | 1.326                        | 0.82                         | 0.299                        | 0.863                        |
| 2005            | 51        | 1809                        | 35.471         | 311057                      | 3          | 1.312                        | 0.832                        | 0.27                         | 0.868                        |
| 2006            | 51        | 1786                        | 35.02          | 294776                      | 3          | 1.32                         | 0.834                        | 0.297                        | 0.857                        |
| 2007            | 51        | 1809                        | 35.471         | 299394                      | 3          | 1.312                        | 0.836                        | 0.272                        | 0.869                        |
| 2008            | 51        | 1792                        | 35.137         | 288757                      | 3          | 1.32                         | 0.835                        | 0.268                        | 0.867                        |
| 2009            | 51        | 1799                        | 35.275         | 278694                      | 2          | 1.314                        | 0.835                        | 0.291                        | 0.8615                       |
| 2010            | 51        | 1806                        | 35.412         | 282262                      | 2          | 1.311                        | 0.837                        | 0.27                         | 0.865                        |
| 2011            | 51        | 1843                        | 36.137         | 333014                      | 3          | 1.297                        | 0.842                        | 0.239                        | 0.871                        |
| 2012            | 51        | 1881                        | 36.882         | 340556                      | 2          | 1.282                        | 0.846                        | 0.231                        | 0.876                        |
| 2013            | 51        | 1590                        | 31.176         | 304568                      | 3          | 1.398                        | 0.813                        | 0.275                        | 0.796                        |
| 2014            | 51        | 1402                        | 27.49          | 225640                      | 3          | 1.476                        | 0.787                        | 0.264                        | 0.736                        |
| 2015            | 51        | 1623                        | 31.82          | 314241                      | 2          | 1.383                        | 0.812                        | 0.248                        | 0.809                        |
| <b>Average</b>  | <b>51</b> | <b>1.7 x 10<sup>3</sup></b> | <b>34.4</b>    | <b>2.9 x 10<sup>5</sup></b> | <b>2.7</b> | <b>1.3</b>                   | <b>0.8</b>                   | <b>0.3</b>                   | <b>0.8</b>                   |
| <b>Variance</b> | <b>0</b>  | <b>1.4 x 10<sup>4</sup></b> | <b>5.4</b>     | <b>6.5 x 10<sup>8</sup></b> | <b>0.2</b> | <b>2.2 x 10<sup>-3</sup></b> | <b>2 x 10<sup>-4</sup></b>   | <b>2.7 x 10<sup>-4</sup></b> | <b>1.4 x 10<sup>-3</sup></b> |
| 2000-2001       | 51        | 1894                        | 37.137         | 573555                      | 2          | 1.277                        | 0.843                        | 0.284                        | 0.884                        |
| 2002-2003       | 51        | 1875                        | 36.765         | 583635                      | 2          | 1.284                        | 0.844                        | 0.296                        | 0.887                        |
| 2004-2005       | 51        | 1898                        | 37.216         | 607286                      | 3          | 1.277                        | 0.845                        | 0.294                        | 0.891                        |
| 2006-2007       | 51        | 1887                        | 37             | 594170                      | 3          | 1.28                         | 0.85                         | 0.296                        | 0.886                        |
| 2008-2009       | 51        | 1889                        | 37.039         | 567452                      | 2          | 1.279                        | 0.851                        | 0.266                        | 0.884                        |
| 2010-2011       | 51        | 1933                        | 37.902         | 615277                      | 2          | 1.262                        | 0.857                        | 0.255                        | 0.893                        |
| 2012-2013       | 51        | 1890                        | 37.059         | 645125                      | 2          | 1.278                        | 0.847                        | 0.267                        | 0.878                        |
| 2014-2015       | 51        | 1650                        | 32.353         | 539881                      | 2          | 1.373                        | 0.817                        | 0.248                        | 0.815                        |
| <b>Average</b>  | <b>51</b> | <b>1.8 x 10<sup>3</sup></b> | <b>36.6</b>    | <b>5.9 x 10<sup>5</sup></b> | <b>2.2</b> | <b>1.3</b>                   | <b>0.8</b>                   | <b>0.3</b>                   | <b>0.9</b>                   |
| <b>Variance</b> | <b>0</b>  | <b>7.8 x 10<sup>3</sup></b> | <b>3</b>       | <b>1 x 10<sup>9</sup></b>   | <b>0.2</b> | <b>1.2 x 10<sup>-3</sup></b> | <b>1.4 x 10<sup>-4</sup></b> | <b>3.7 x 10<sup>-4</sup></b> | <b>6.5 x 10<sup>-4</sup></b> |
| 2000-2003       | 51        | 1972                        | 38.667         | 1157191                     | 2          | 1.246                        | 0.857                        | 0.286                        | 0.905                        |
| 2004-2007       | 51        | 1994                        | 39.098         | 1201456                     | 2          | 1.238                        | 0.865                        | 0.283                        | 0.911                        |
| 2008-2011       | 51        | 1997                        | 39.157         | 1182729                     | 2          | 1.236                        | 0.865                        | 0.279                        | 0.907                        |
| 2012-2015       | 51        | 1912                        | 37.49          | 1185006                     | 2          | 1.27                         | 0.849                        | 0.248                        | 0.881                        |
| <b>Average</b>  | <b>51</b> | <b>1.9 x 10<sup>3</sup></b> | <b>38.6</b>    | <b>1.2 x 10<sup>6</sup></b> | <b>2</b>   | <b>1.2</b>                   | <b>0.8</b>                   | <b>0.3</b>                   | <b>0.9</b>                   |
| <b>Variance</b> | <b>0</b>  | <b>1.5 x 10<sup>3</sup></b> | <b>0.6</b>     | <b>3.3 x 10<sup>8</sup></b> | <b>0</b>   | <b>2.4 x 10<sup>-4</sup></b> | <b>5.8 x 10<sup>-5</sup></b> | <b>3 x 10<sup>-4</sup></b>   | <b>1.8 x 10<sup>-4</sup></b> |
| 2000-2015       | 51        | 2155                        | 42.255         | 4726384                     | 2          | 1.175                        | 0.889                        | 0.283                        | 0.939                        |
