# Supplementary material for: Complex network of United States migration
Source: Springer Nature journal article supplement (doi:10.1186/s40649-019-0061-6), 2019-01-24
Supplement: MOESM3 [file 16419388]

| Year              | Edges         |               | Migration         |                  |
|-------------------|---------------|---------------|-------------------|------------------|
|                   | intrastate    | interstate    | intrastate        | interstate       |
| 2000              | 26,894        | 32,421        | 10,193,191        | 4,332,012        |
| 2001              | 26,771        | 31,916        | 10,480,948        | 4,245,201        |
| 2002              | 26,404        | 30,953        | 10,399,513        | 4,098,729        |
| 2003              | 27,481        | 32,208        | 10,979,610        | 4,287,552        |
| 2004              | 26,713        | 32,902        | 10,629,305        | 4,478,346        |
| 2005              | 27,421        | 34,937        | 10,989,287        | 4,874,651        |
| 2006              | 26,927        | 33,957        | 10,422,028        | 4,611,551        |
| 2007              | 27,644        | 34,184        | 10,670,261        | 4,598,869        |
| 2008              | 27,017        | 32,646        | 10,425,184        | 4,301,442        |
| 2009              | 26,004        | 30,344        | 10,231,726        | 3,981,705        |
| 2010              | 26,268        | 32,200        | 10,145,449        | 4,249,952        |
| 2011              | 28,237        | 36,933        | 11,881,872        | 5,101,884        |
| 2012              | 28,555        | 38,531        | 12,018,720        | 5,349,660        |
| 2013              | 21,809        | 24,646        | 10,998,072        | 4,534,931        |
| 2014              | 18,439        | 17,562        | 8,402,501         | 3,105,150        |
| 2015              | 21,906        | 24,983        | 11,396,802        | 4,629,520        |
| <b>Average</b>    | <b>25,906</b> | <b>31,333</b> | <b>10,641,529</b> | <b>4,423,822</b> |
| <b>Percentage</b> | <b>45.26%</b> | <b>54.74%</b> | <b>70.64%</b>     | <b>29.36%</b>    |
