# Supplementary material for: Complex network of United States migration
Source: Springer Nature journal article supplement (doi:10.1186/s40649-019-0061-6), 2019-01-24
Supplement: MOESM5 [file 16419388]

| State          | 2000 | 2001 | 2002 | 2003 | 2004 | 2005 | 2006 | 2007 | 2008 | 2009 | 2010 | 2011 | 2012 | 2013 | 2014 | 2015 |
|----------------|------|------|------|------|------|------|------|------|------|------|------|------|------|------|------|------|
| Alabama        | R    |      |      |      | R    |      |      |      | R    |      |      |      | R    |      |      |      |
| Alaska         | R    |      |      |      | R    |      |      |      | R    |      |      |      | R    |      |      |      |
| Arizona        | R    |      |      |      | R    |      |      |      | R    |      |      |      | R    |      |      |      |
| Arkansas       | R    |      |      |      | R    |      |      |      | R    |      |      |      | R    |      |      |      |
| California     | D    |      |      |      | D    |      |      |      | D    |      |      |      | D    |      |      |      |
| Colorado       | R    |      |      |      | R    |      |      |      | D    |      |      |      | D    |      |      |      |
| Connecticut    | D    |      |      |      | D    |      |      |      | D    |      |      |      | D    |      |      |      |
| Delaware       | D    |      |      |      | D    |      |      |      | D    |      |      |      | D    |      |      |      |
| D.C.           | D    |      |      |      | D    |      |      |      | D    |      |      |      | D    |      |      |      |
| Florida        | R    |      |      |      | R    |      |      |      | D    |      |      |      | D    |      |      |      |
| Georgia        | R    |      |      |      | R    |      |      |      | R    |      |      |      | R    |      |      |      |
| Hawaii         | D    |      |      |      | D    |      |      |      | D    |      |      |      | D    |      |      |      |
| Idaho          | R    |      |      |      | R    |      |      |      | R    |      |      |      | R    |      |      |      |
| Illinois       | D    |      |      |      | D    |      |      |      | D    |      |      |      | D    |      |      |      |
| Indiana        | R    |      |      |      | R    |      |      |      | D    |      |      |      | R    |      |      |      |
| Iowa           | D    |      |      |      | R    |      |      |      | D    |      |      |      | D    |      |      |      |
| Kansas         | R    |      |      |      | R    |      |      |      | R    |      |      |      | R    |      |      |      |
| Kentucky       | R    |      |      |      | R    |      |      |      | R    |      |      |      | R    |      |      |      |
| Louisiana      | R    |      |      |      | R    |      |      |      | R    |      |      |      | R    |      |      |      |
| Maine          | D    |      |      |      | D    |      |      |      | D    |      |      |      | D    |      |      |      |
| Maryland       | D    |      |      |      | D    |      |      |      | D    |      |      |      | D    |      |      |      |
| Massachusetts  | D    |      |      |      | D    |      |      |      | D    |      |      |      | D    |      |      |      |
| Michigan       | D    |      |      |      | D    |      |      |      | D    |      |      |      | D    |      |      |      |
| Minnesota      | D    |      |      |      | D    |      |      |      | D    |      |      |      | D    |      |      |      |
| Mississippi    | R    |      |      |      | R    |      |      |      | R    |      |      |      | R    |      |      |      |
| Missouri       | R    |      |      |      | R    |      |      |      | R    |      |      |      | R    |      |      |      |
| Montana        | R    |      |      |      | R    |      |      |      | R    |      |      |      | R    |      |      |      |
| Nebraska       | R    |      |      |      | R    |      |      |      | R    |      |      |      | R    |      |      |      |
| Nevada         | R    |      |      |      | R    |      |      |      | D    |      |      |      | D    |      |      |      |
| New Hampshire  | R    |      |      |      | D    |      |      |      | D    |      |      |      | D    |      |      |      |
| New Jersey     | D    |      |      |      | D    |      |      |      | D    |      |      |      | D    |      |      |      |
| New Mexico     | D    |      |      |      | R    |      |      |      | D    |      |      |      | D    |      |      |      |
| New York       | D    |      |      |      | D    |      |      |      | D    |      |      |      | D    |      |      |      |
| North Carolina | R    |      |      |      | R    |      |      |      | D    |      |      |      | R    |      |      |      |
| North Dakota   | R    |      |      |      | R    |      |      |      | R    |      |      |      | R    |      |      |      |
| Ohio           | R    |      |      |      | R    |      |      |      | D    |      |      |      | D    |      |      |      |
| Oklahoma       | R    |      |      |      | R    |      |      |      | R    |      |      |      | R    |      |      |      |
| Oregon         | D    |      |      |      | D    |      |      |      | D    |      |      |      | D    |      |      |      |
| Pennsylvania   | D    |      |      |      | D    |      |      |      | D    |      |      |      | D    |      |      |      |
| Rhode Island   | D    |      |      |      | D    |      |      |      | D    |      |      |      | D    |      |      |      |
| South Carolina | R    |      |      |      | R    |      |      |      | R    |      |      |      | R    |      |      |      |
| South Dakota   | R    |      |      |      | R    |      |      |      | R    |      |      |      | R    |      |      |      |
| Tennessee      | R    |      |      |      | R    |      |      |      | R    |      |      |      | R    |      |      |      |
| Texas          | R    |      |      |      | R    |      |      |      | R    |      |      |      | R    |      |      |      |
| Utah           | R    |      |      |      | R    |      |      |      | R    |      |      |      | R    |      |      |      |
| Vermont        | D    |      |      |      | D    |      |      |      | D    |      |      |      | D    |      |      |      |
| Virginia       | R    |      |      |      | R    |      |      |      | D    |      |      |      | D    |      |      |      |
| Washington     | D    |      |      |      | D    |      |      |      | D    |      |      |      | D    |      |      |      |
| West Virginia  | R    |      |      |      | R    |      |      |      | R    |      |      |      | R    |      |      |      |
| Wisconsin      | D    |      |      |      | D    |      |      |      | D    |      |      |      | D    |      |      |      |
| Wyoming        | R    |      |      |      | R    |      |      |      | R    |      |      |      | R    |      |      |      |
|                | 2000 | 2001 | 2002 | 2003 | 2004 | 2005 | 2006 | 2007 | 2008 | 2009 | 2010 | 2011 | 2012 | 2013 | 2014 | 2015 |
