# Supplementary figures and images for: Complex network of United States migration
Source: Springer Nature journal article supplement (doi:10.1186/s40649-019-0061-6), 2019-01-24

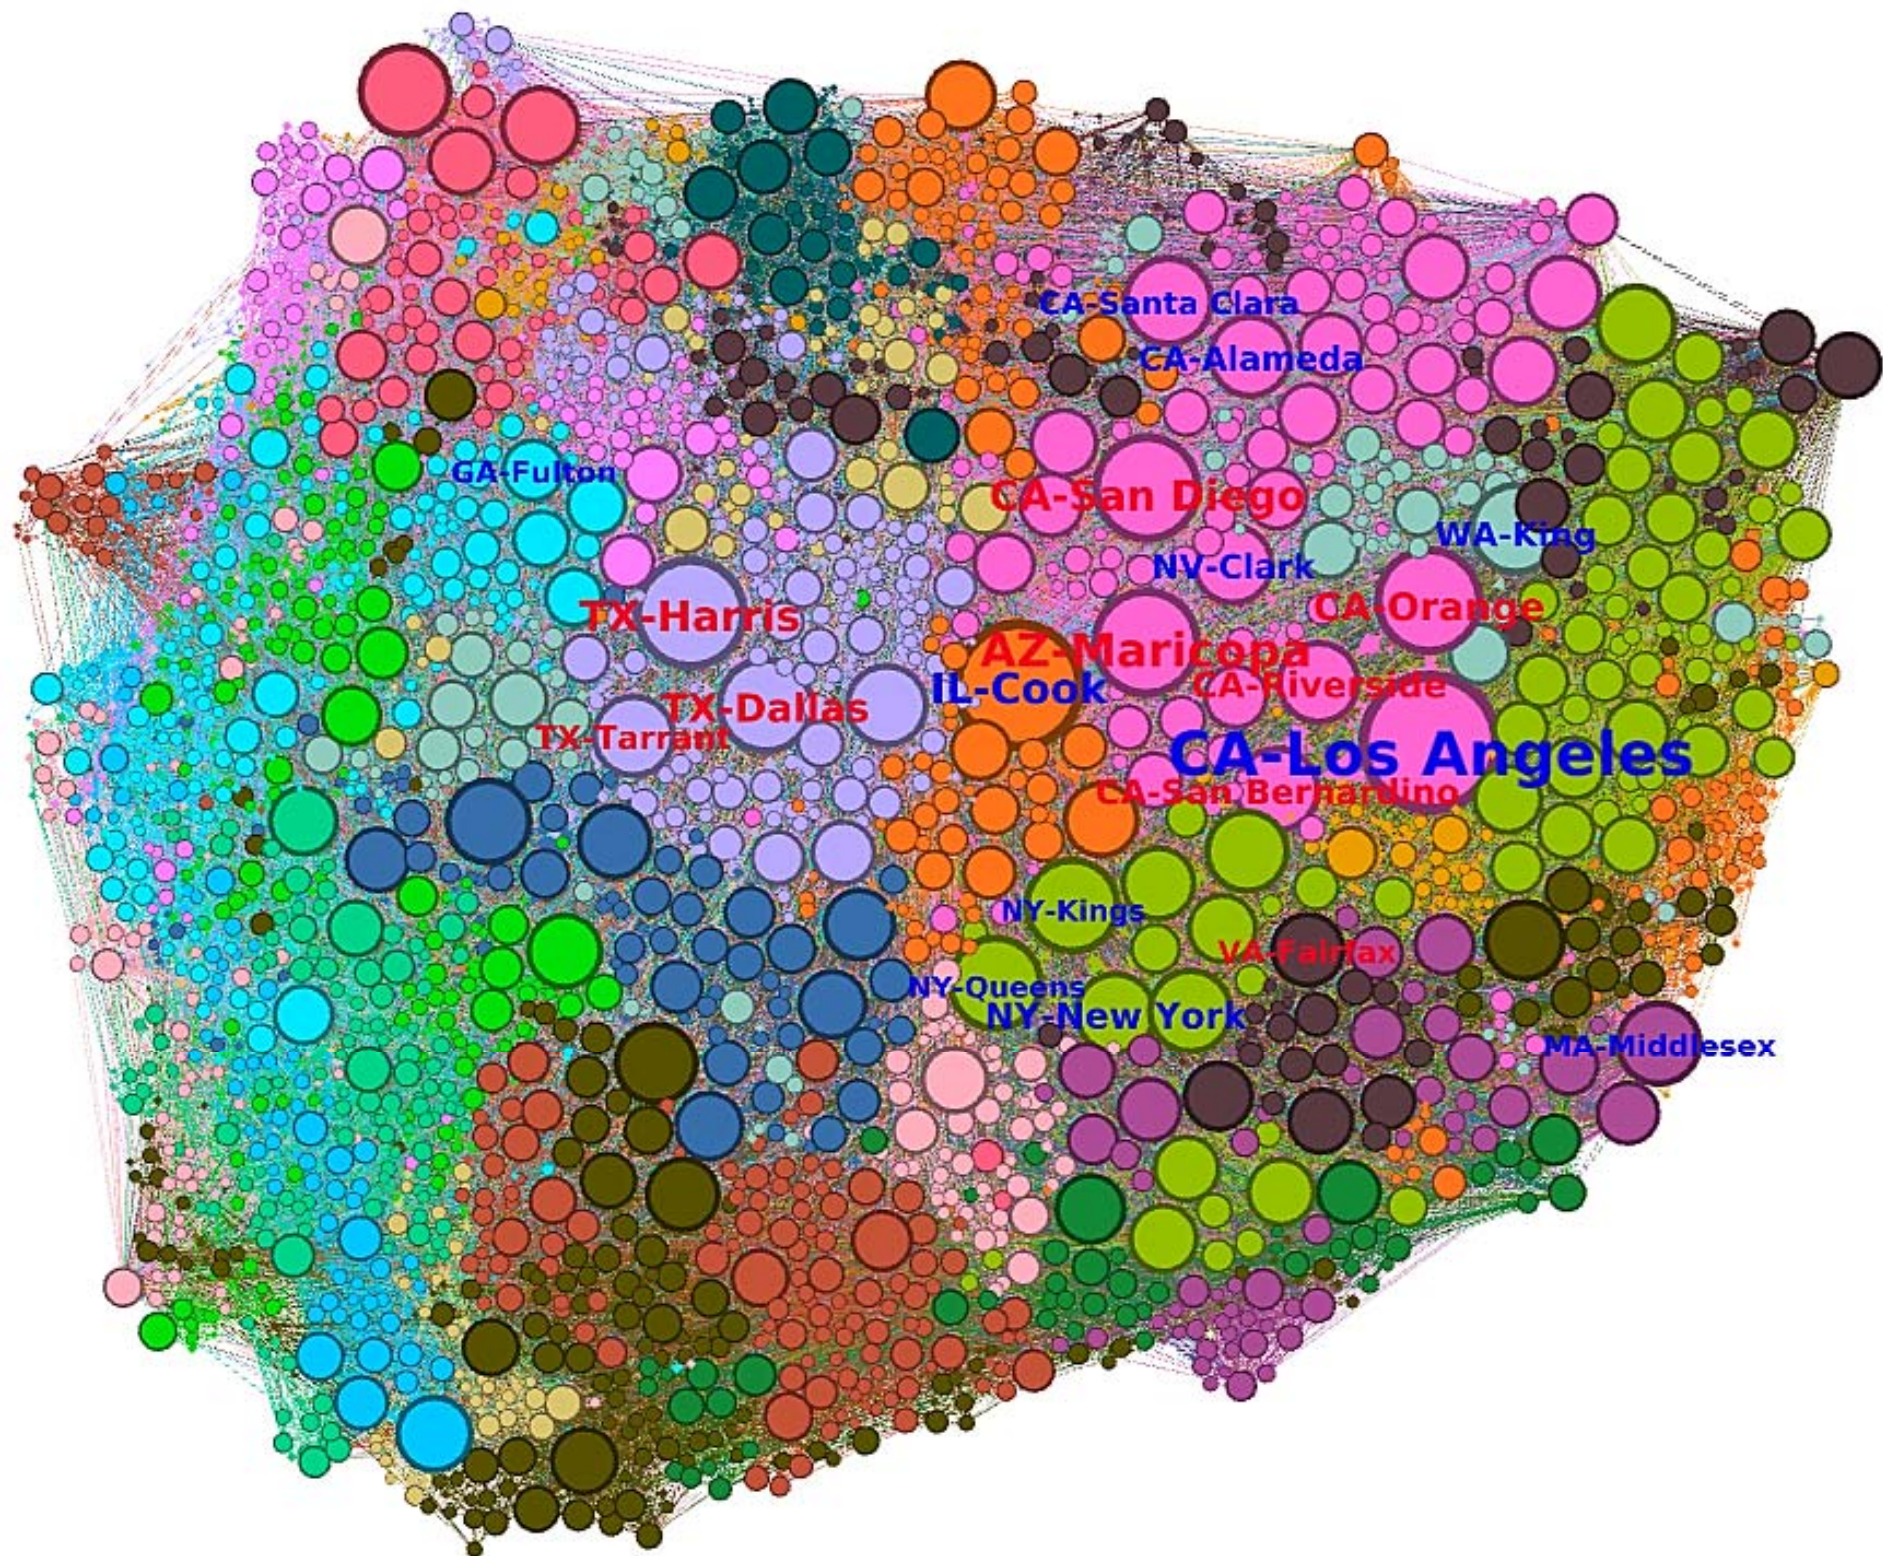

Supplement: MOESM4 [file 16419388]

# A - County Migration by Population

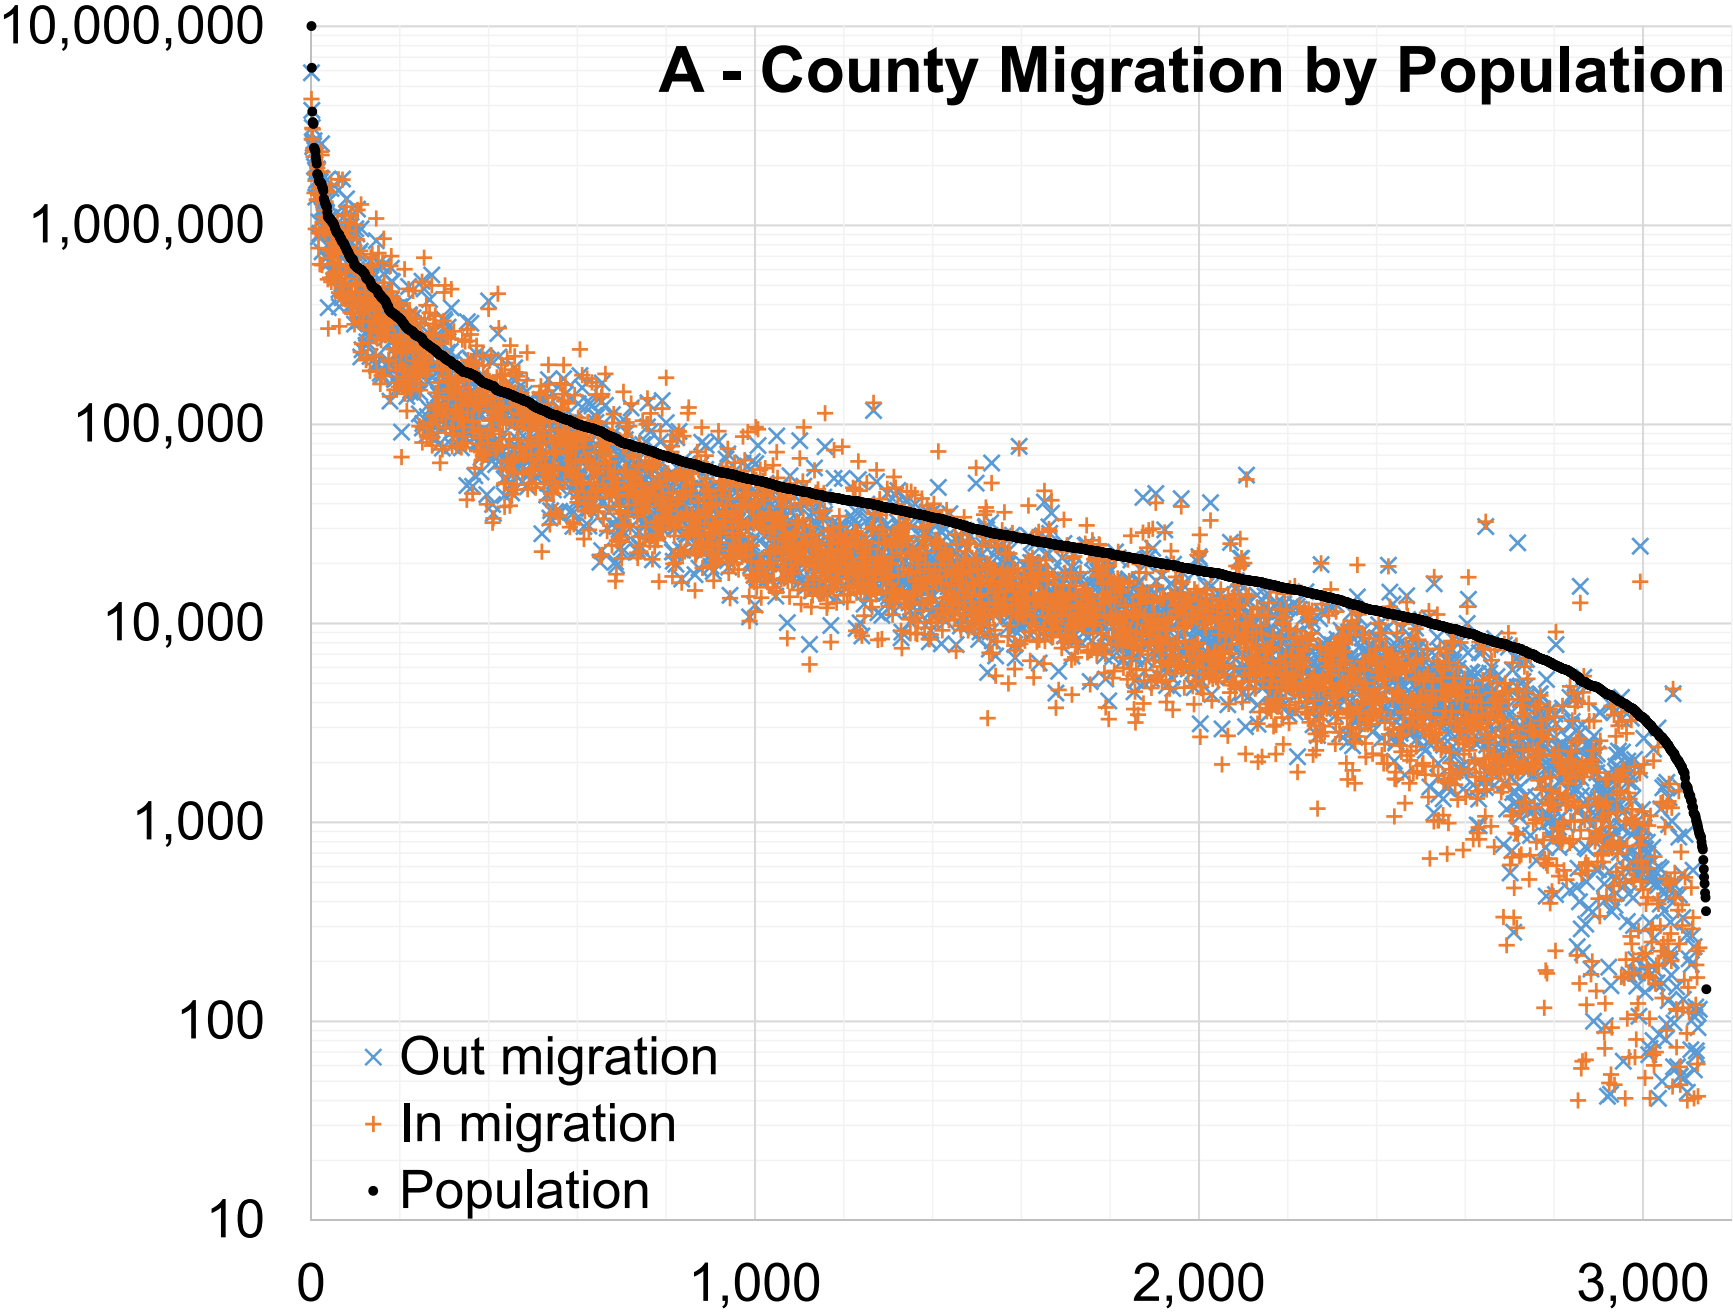

100,000,000

# B - State Migration by Population

10,000,000

1,000,000

100,000

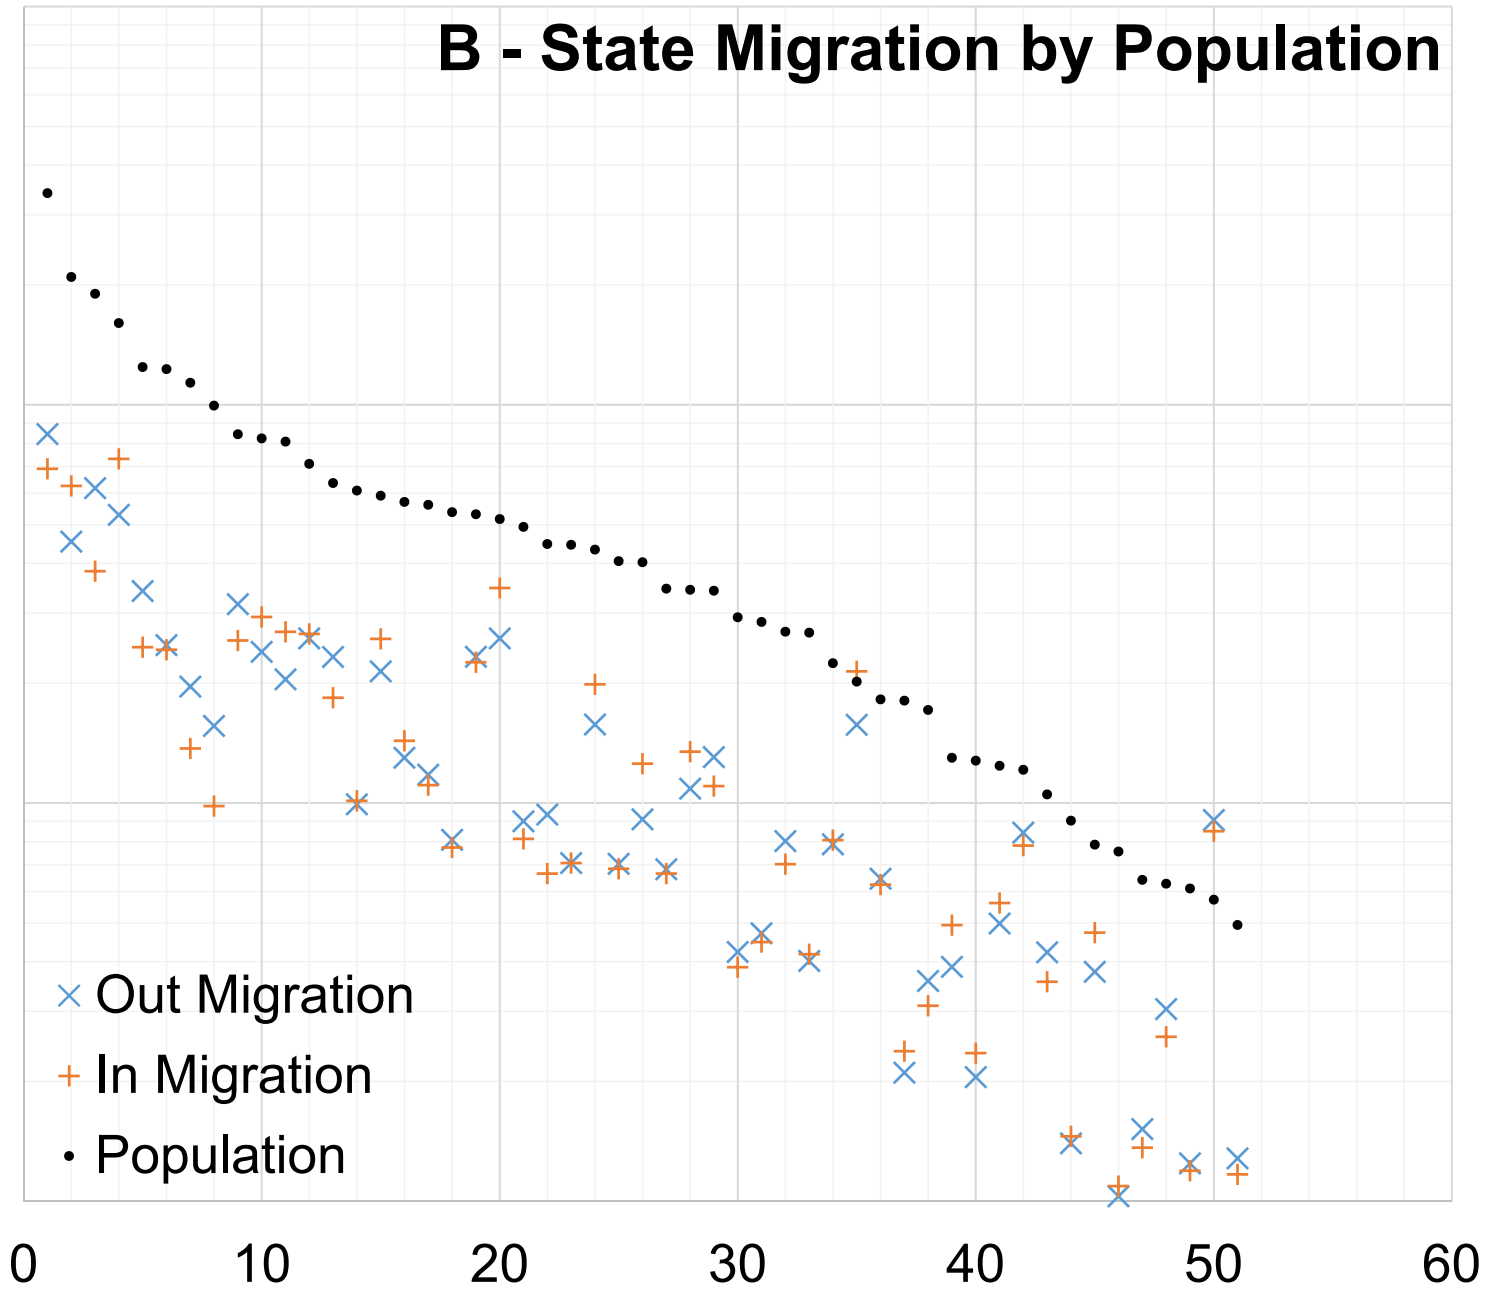

0

10

20

30

40

50

60

Supplement: MOESM6 [file 16419388]

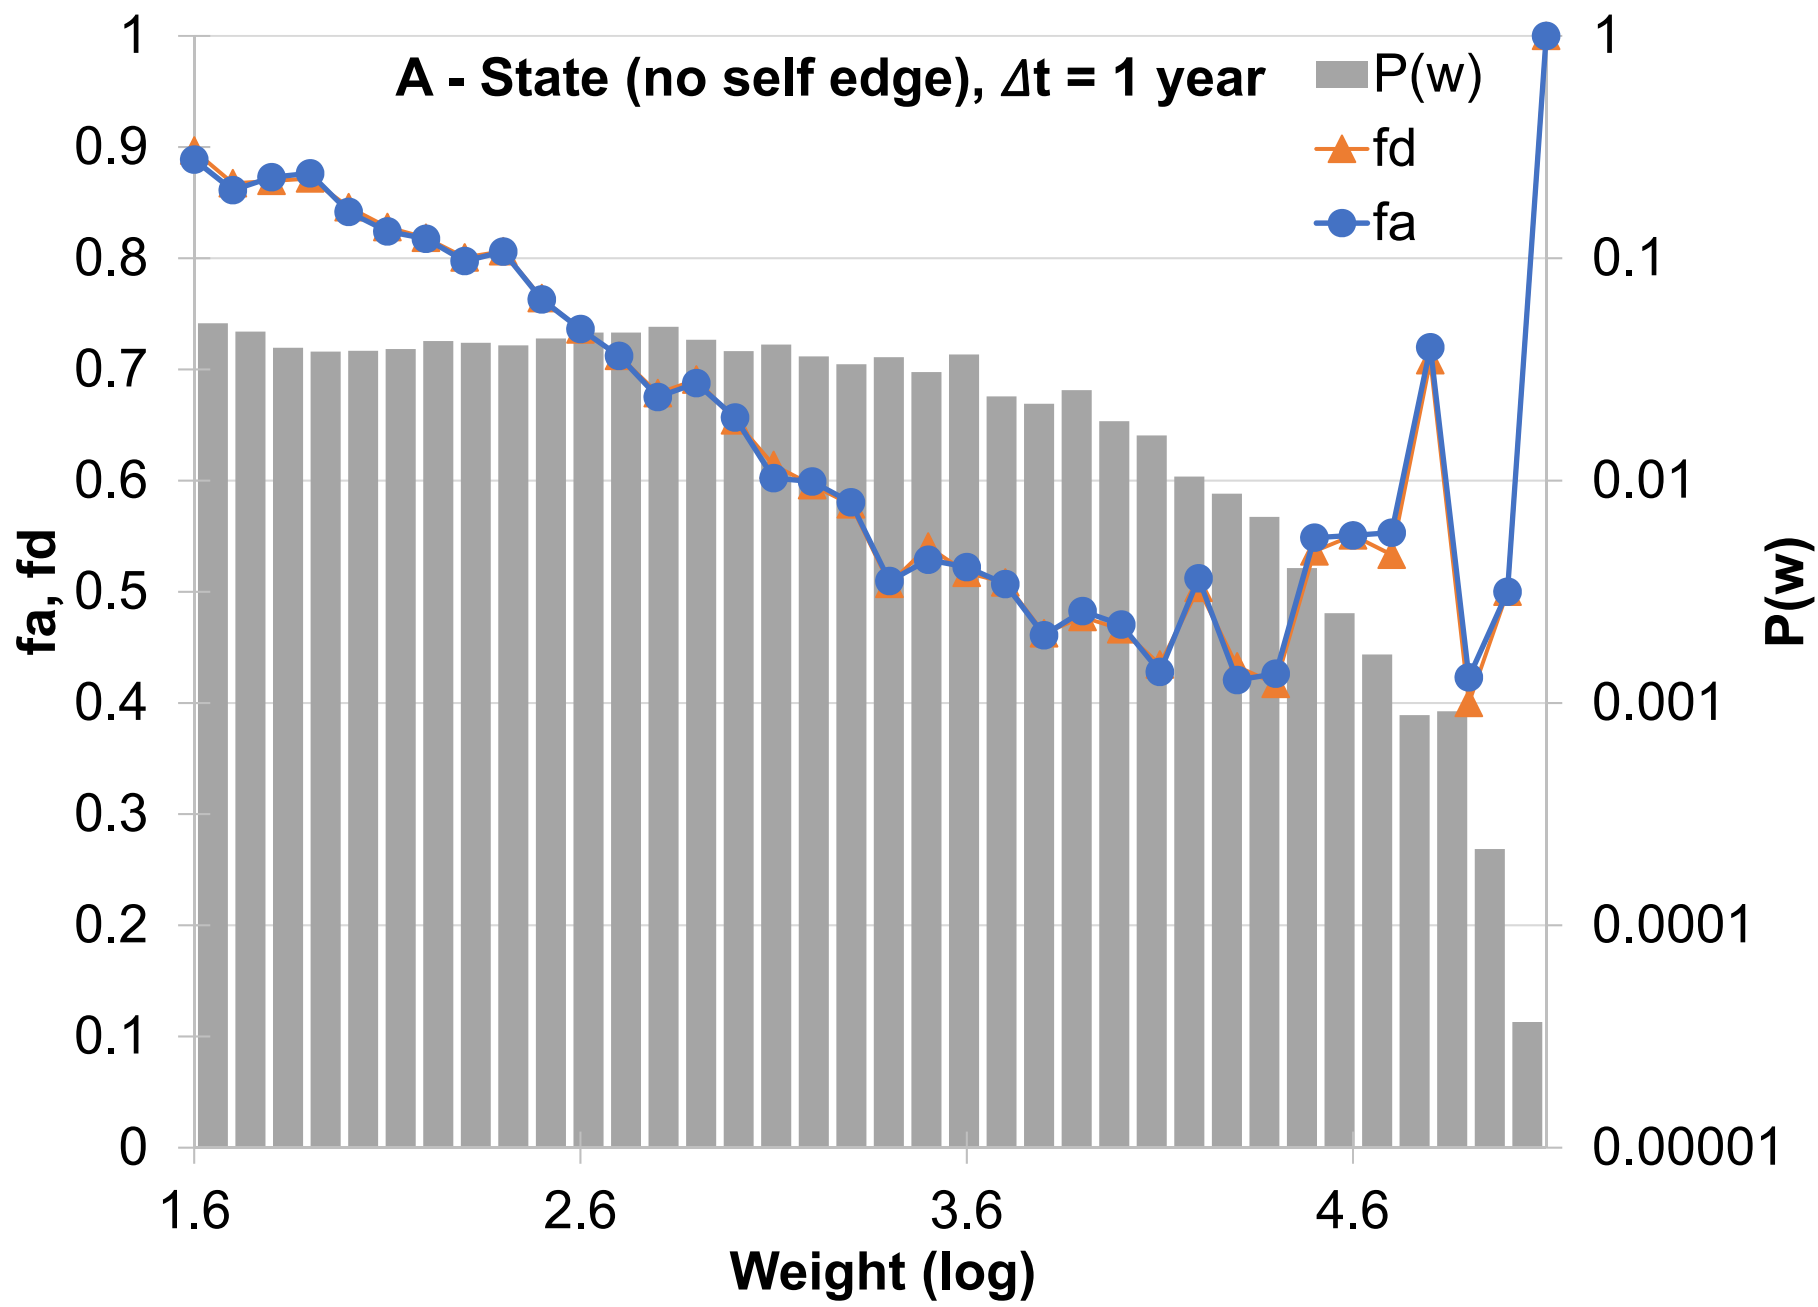

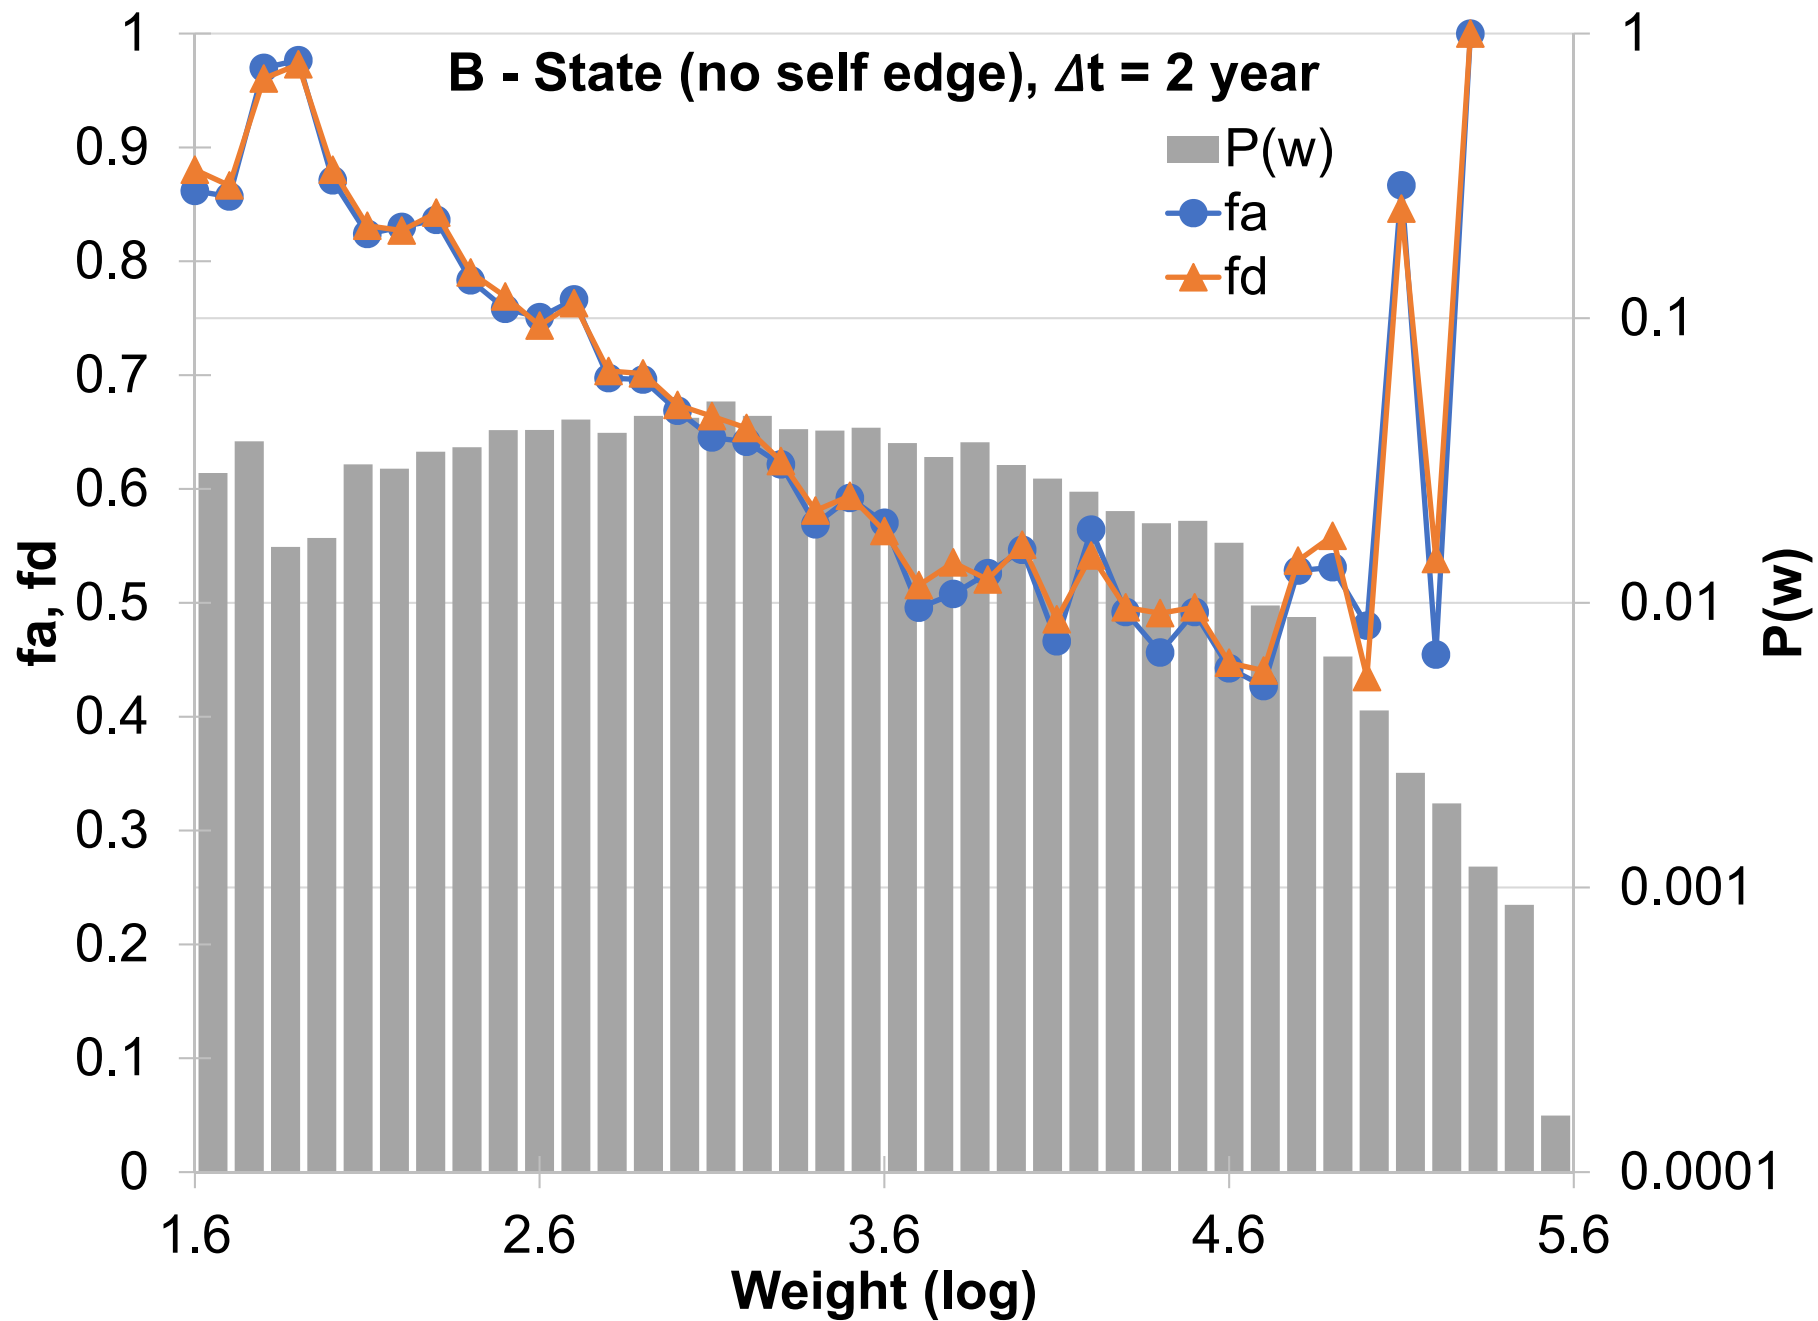

Supplement: MOESM7 [file 16419388]

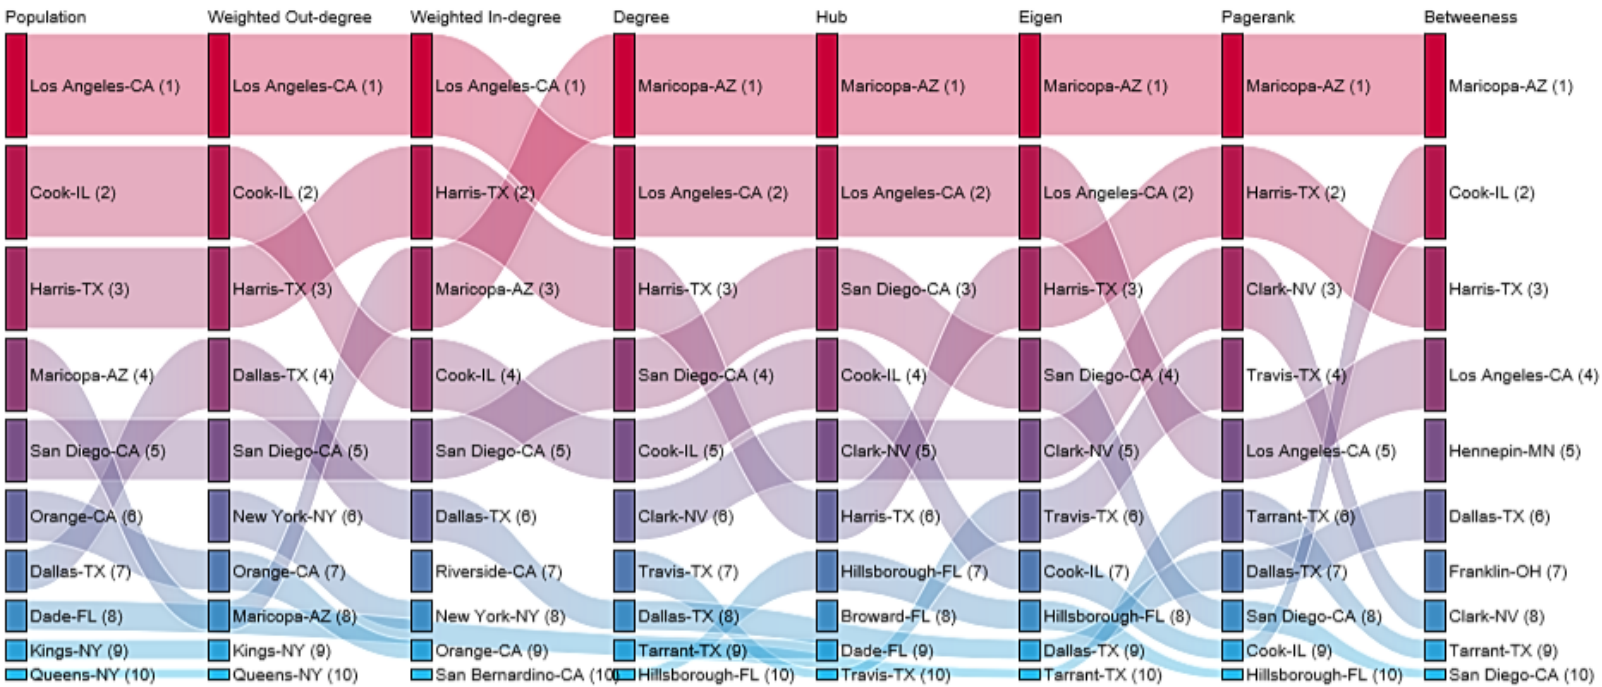

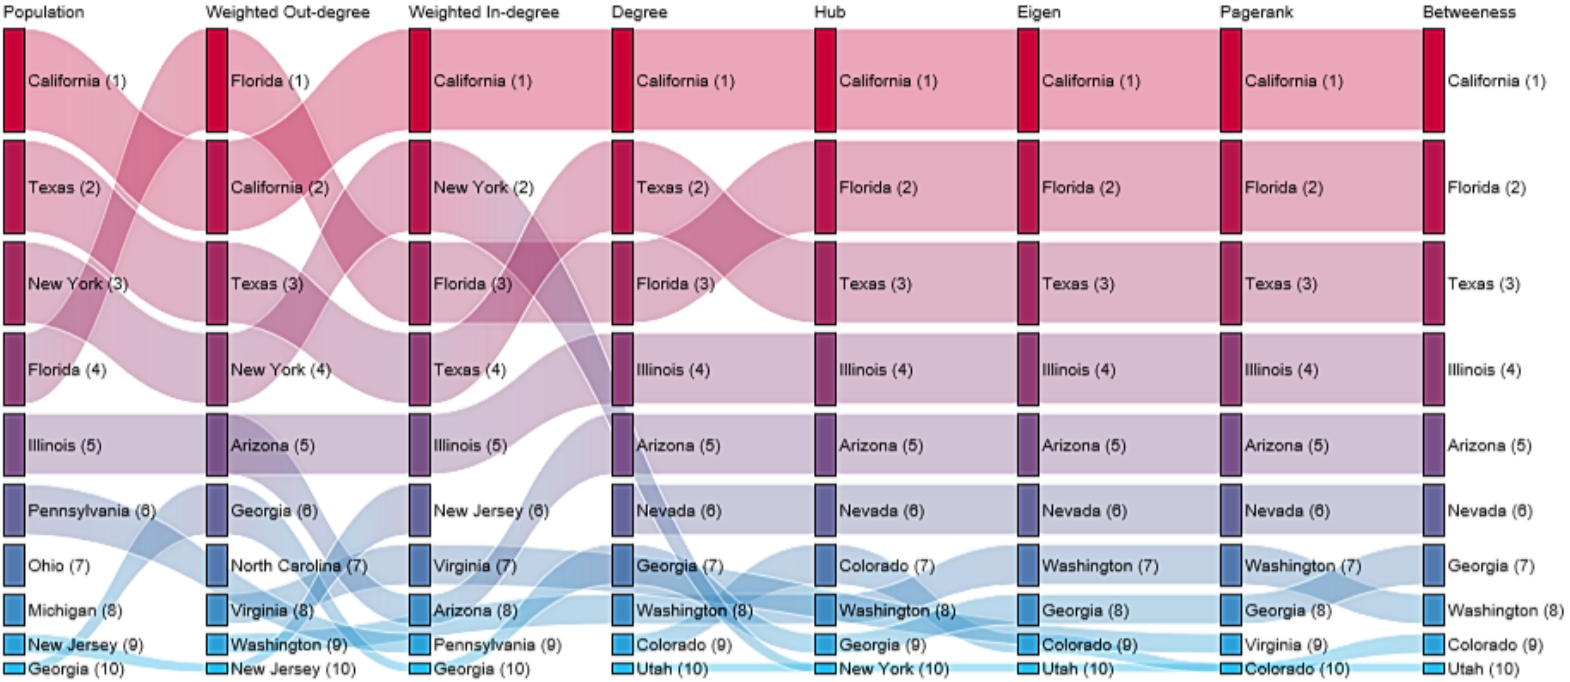

Supplement: MOESM8 [file 16419388]
